# Supplementary material for: Dynamic DNA methylation landscape defines brown and white cell specificity during adipogenesis
Source: PubMed Central journal article supplement (PMC5034609; doi:10.1016/j.molmet.2016.08.006), 2016-08-17
Supplement: mmc2.pdf [file mmc2.pdf]

**A**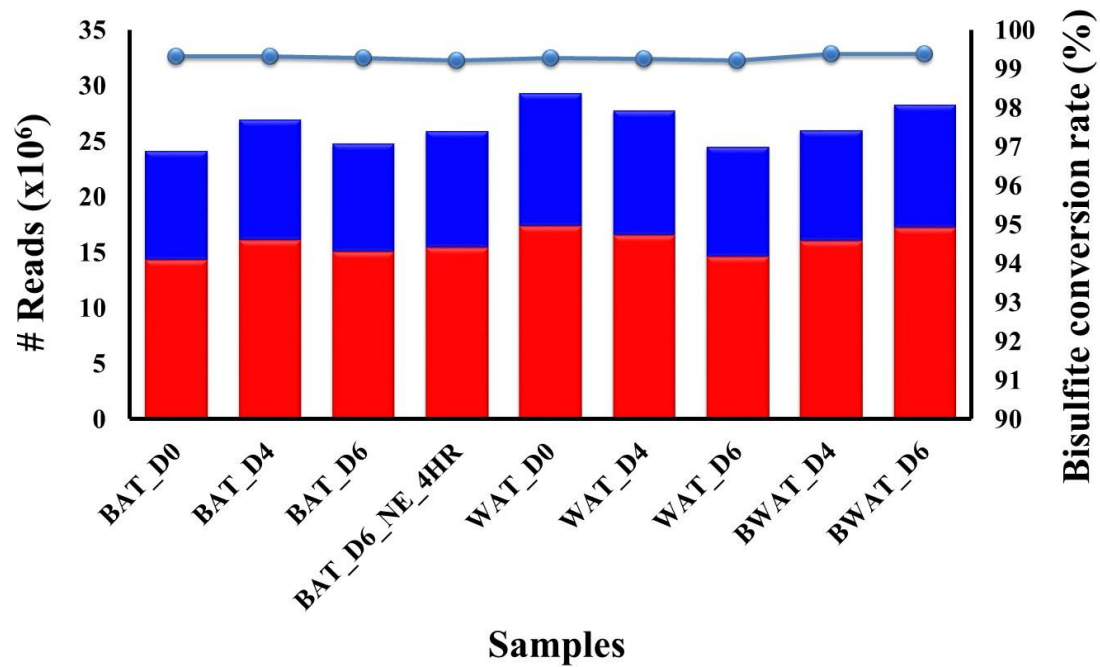**B**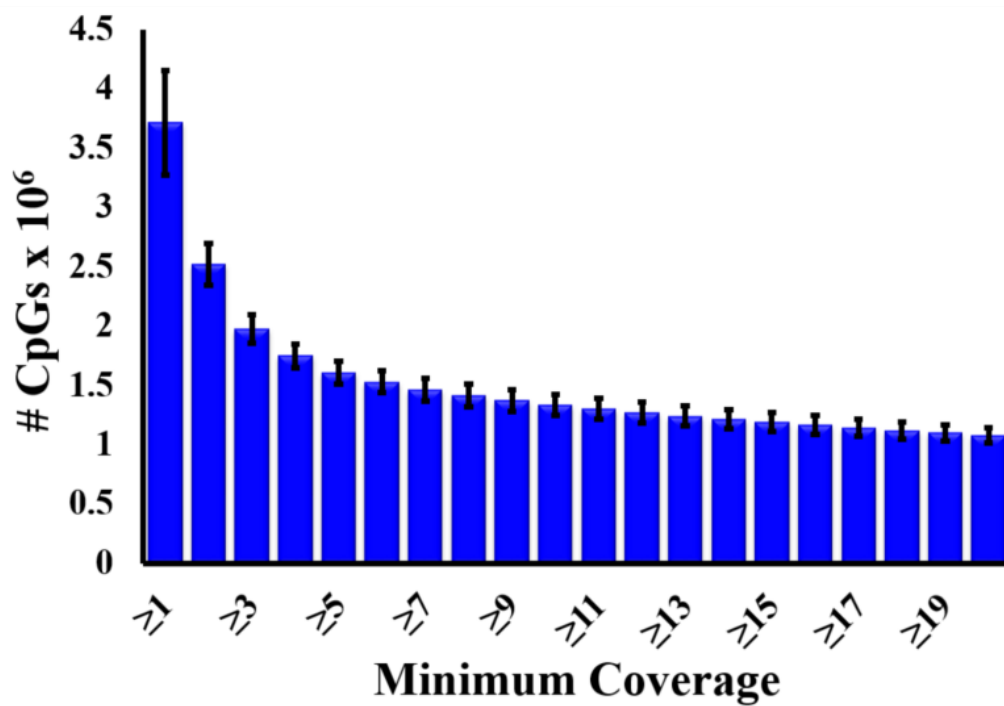**C**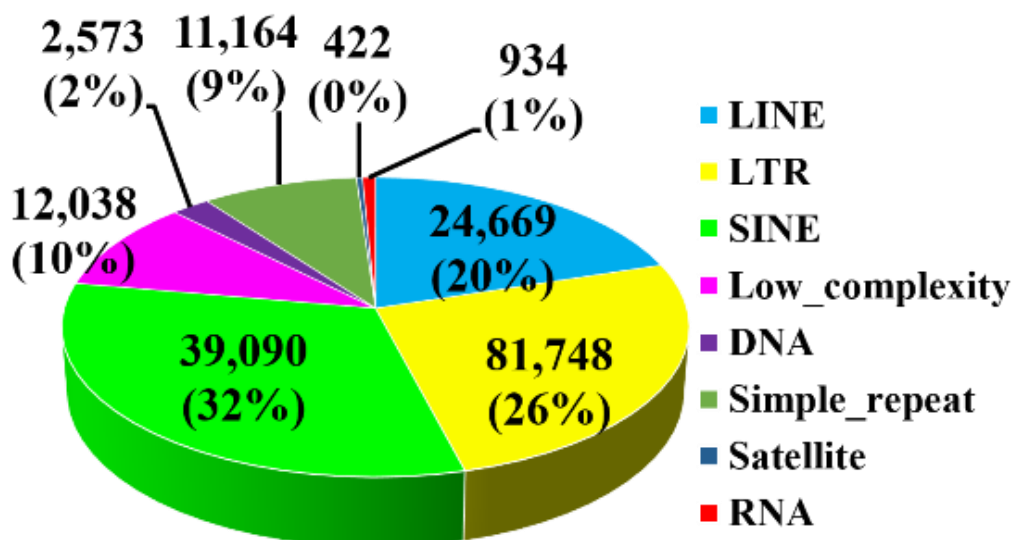**Figure S1**

A

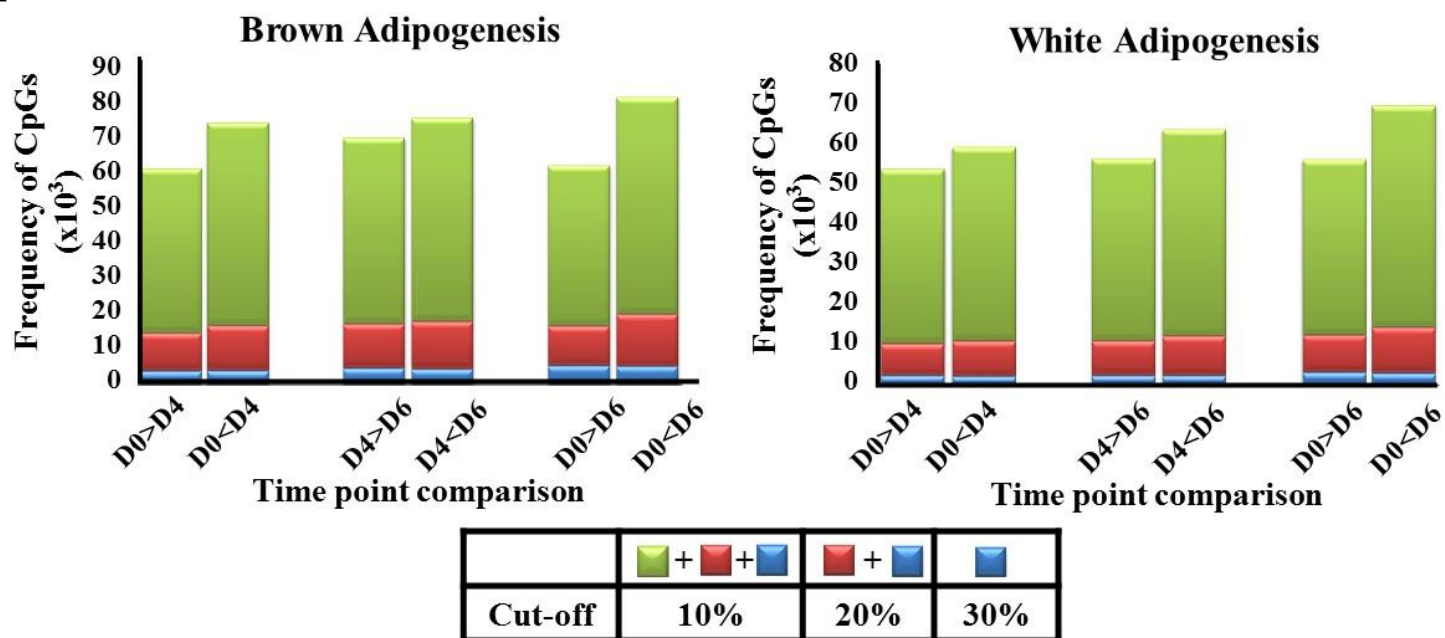

B

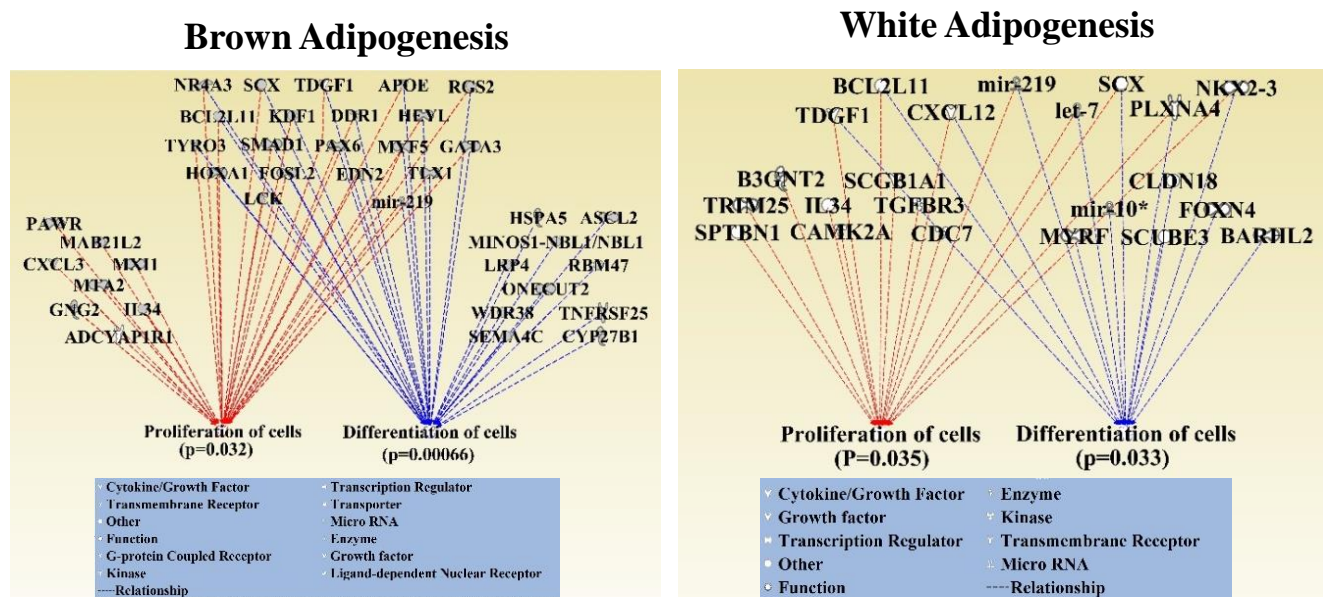

C

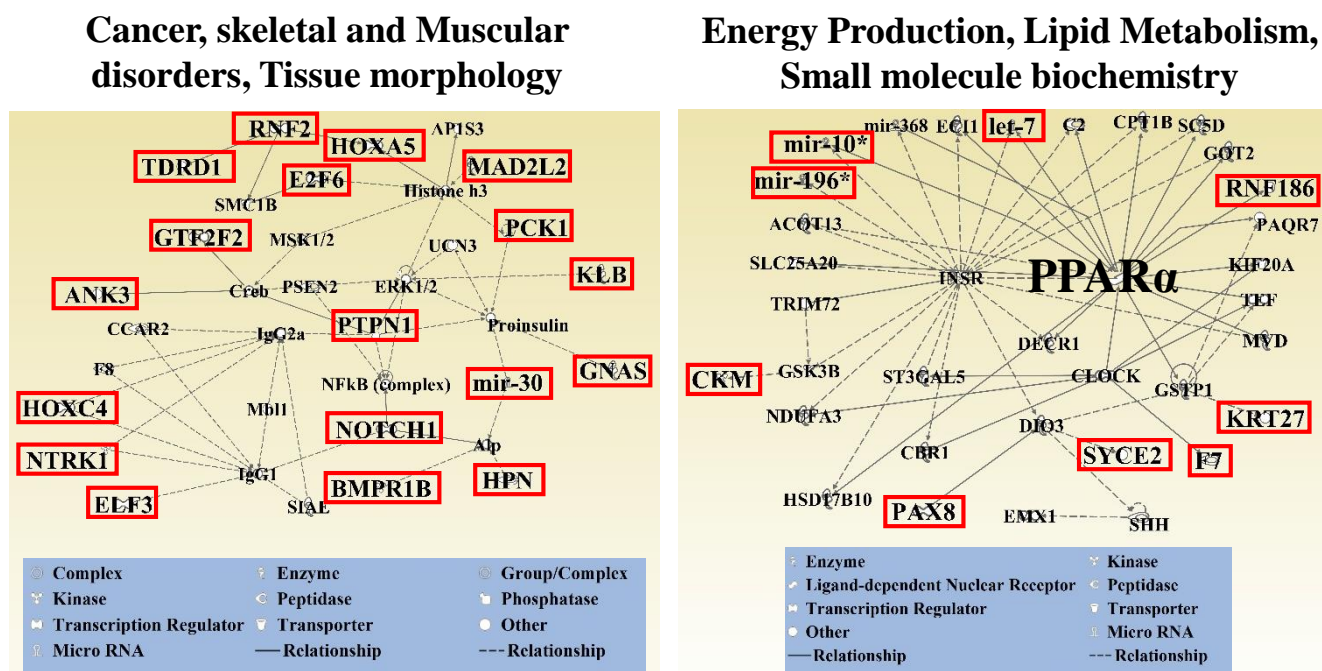

Figure S2

**A**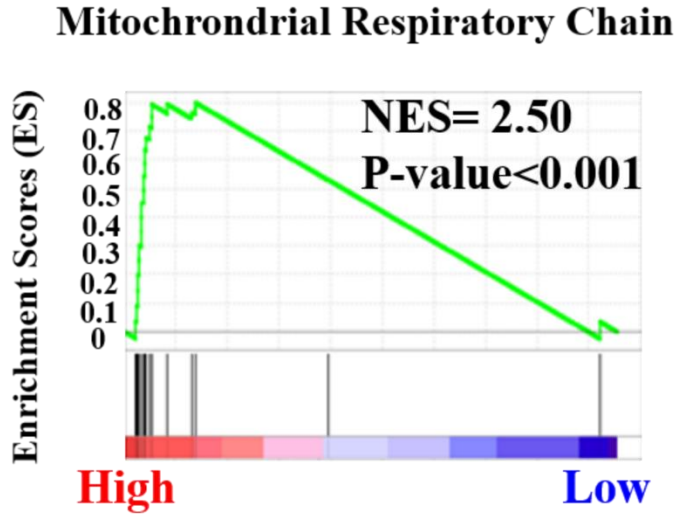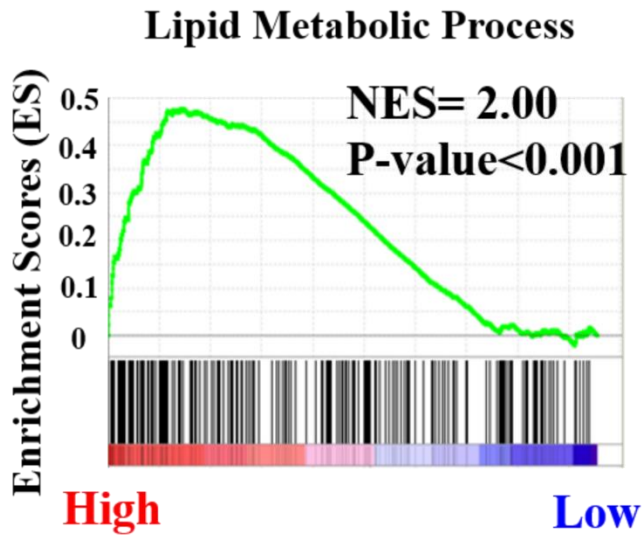**B**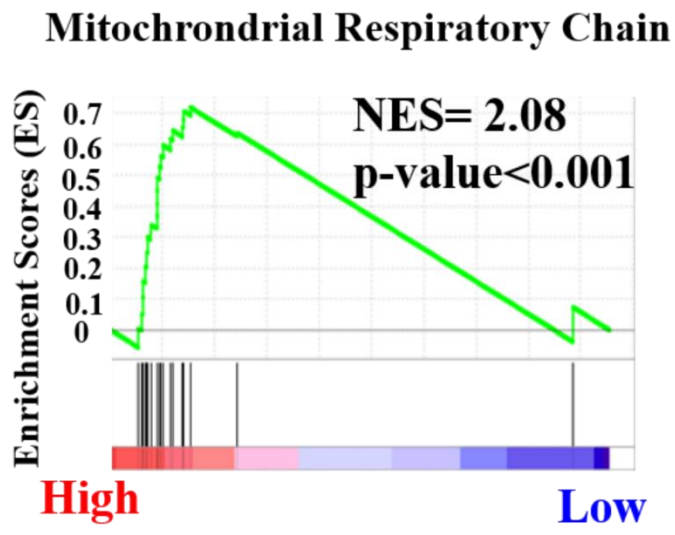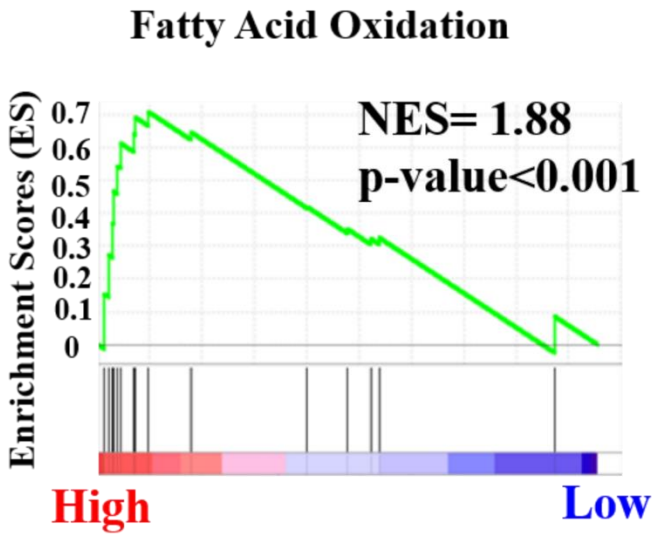

Figure S3



A

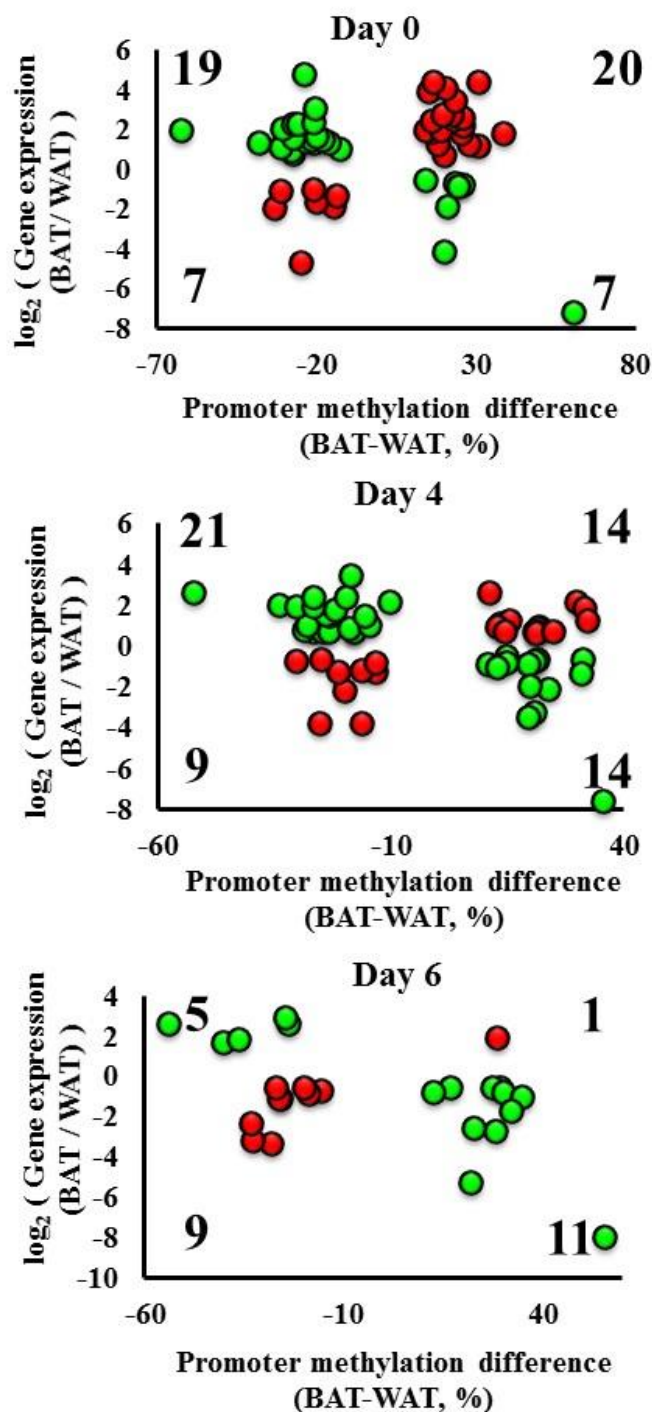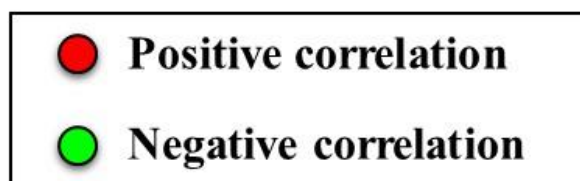

B

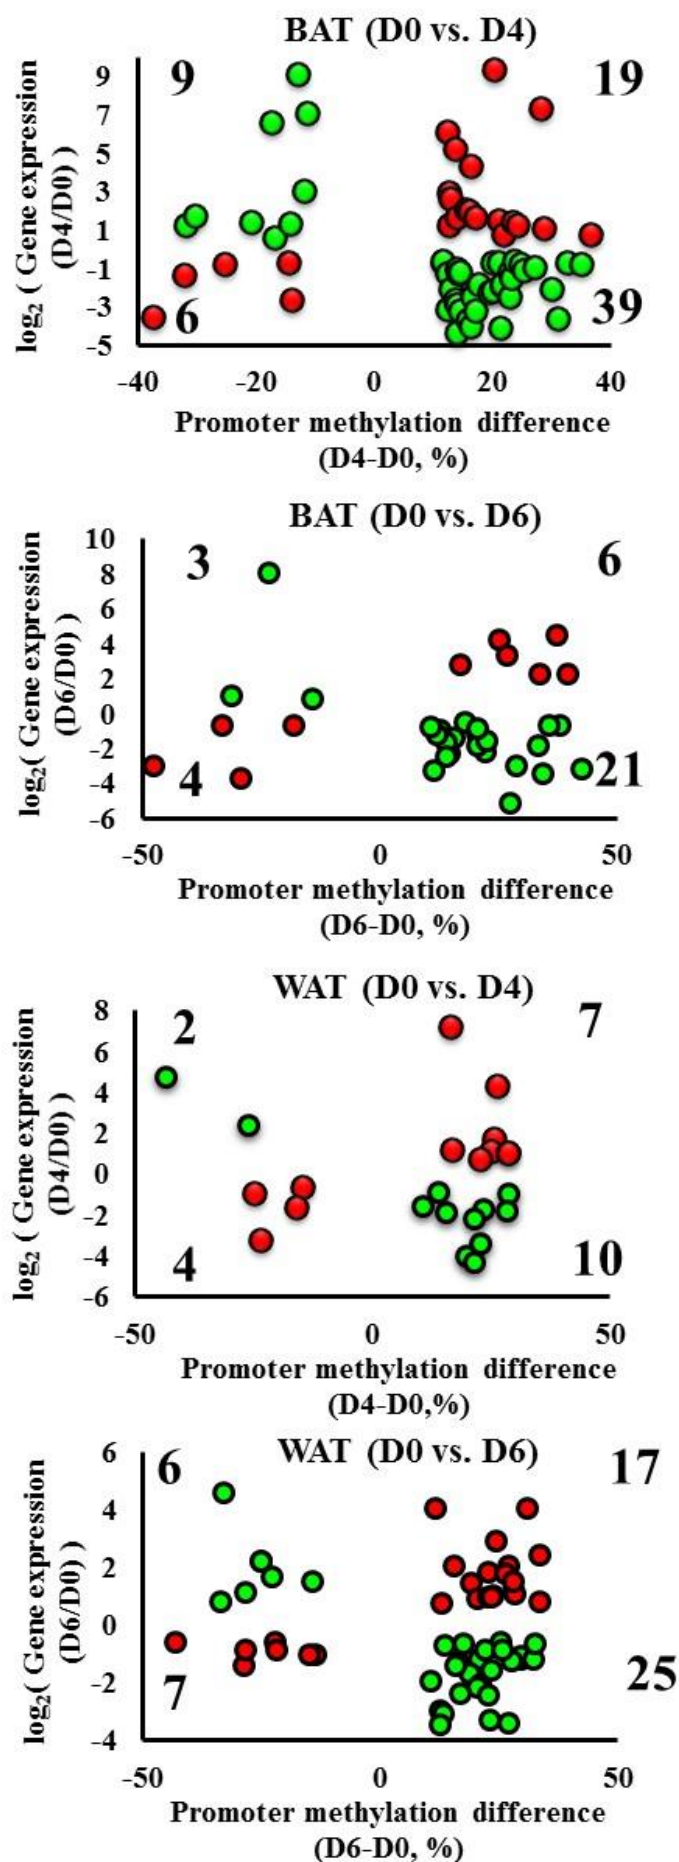

Figure S4
